# Supplementary material for: Assessment of heterogeneity and disease onset in the Parkinson’s Progression Markers Initiative (PPMI) cohort using the α-synuclein seed amplification assay: a cross-sectional study
Source: bioRxiv or medRxiv preprint supplement (doi:10.1101/2023.02.27.23286156), 2023-03-01
Supplement: Supplementary file [file media-1.pdf]

|    | Author                | Highest degree | Full professor | Roles                                                                                                                                                            |
|----|-----------------------|----------------|----------------|------------------------------------------------------------------------------------------------------------------------------------------------------------------|
| 1  | Andrew Siderowf       | MD             | Yes            | conceptualization, data curation, formal analysis, investigation, methodology, supervision, validation, writing – original draft, and writing– review & editing. |
| 1  | Luis Concha-Marambio  | PhD            |                | conceptualization, data curation, formal analysis, investigation, methodology, validation, writing – original draft, and writing– review & editing.              |
| 3  | David-Erick Lafontant | MS             |                | conceptualization, data curation, formal analysis, methodology, validation, and writing– review & editing.                                                       |
| 4  | Carly M. Farris       | MS             |                | data curation, formal analysis, methodology, validation, and writing– review & editing.                                                                          |
| 5  | Yihua Ma              | MS             |                | data curation, formal analysis, methodology, validation, and writing– review & editing.                                                                          |
| 6  | Paula A. Urenia       | BA             |                | data curation, formal analysis, methodology, validation, and writing– review & editing.                                                                          |
| 7  | Hieu Nguyen           | MS             |                | data curation, formal analysis, methodology, validation, and writing– review & editing.                                                                          |
| 8  | Roy N. Alcalay        | MD             | Yes            | conceptualization, investigation, methodology, supervision, and writing– review & editing.                                                                       |
| 9  | Lana M. Chahine       | MD             |                | conceptualization, investigation, methodology, supervision, and writing– review & editing.                                                                       |
| 10 | Tatiana Foroud        | PhD            | Yes            | conceptualization, investigation, methodology, supervision, and writing– review & editing.                                                                       |
| 11 | Douglas Galasko       | MD             | Yes            | conceptualization, investigation, methodology, supervision, and writing– review & editing.                                                                       |
| 12 | Karl Kieburz          | MD             | Yes            | conceptualization, investigation, methodology, supervision, and writing– review & editing.                                                                       |
| 13 | Kalpana Merchant      | PhD            | Yes            | conceptualization, investigation, methodology, supervision, and writing– review & editing.                                                                       |
| 14 | Brit Mollenhauer      | MD             | Yes            | conceptualization, investigation, methodology, supervision, and writing– review & editing.                                                                       |
| 15 | Kathleen L. Poston    | MD             | Yes            | conceptualization, investigation, methodology, supervision, and writing– review & editing.                                                                       |
| 16 | John Seibyl           | MD             |                | conceptualization, investigation, methodology, supervision, and writing– review & editing.                                                                       |
| 17 | Tanya Simuni          | MD             | Yes            | conceptualization, investigation, methodology, supervision, and writing– review & editing.                                                                       |

|    |                        |     |     |                                                                                                                                                                                    |
|----|------------------------|-----|-----|------------------------------------------------------------------------------------------------------------------------------------------------------------------------------------|
| 18 | Caroline M. Tanner     | MD  | yes | conceptualization, investigation, methodology, supervision, and writing–review & editing.                                                                                          |
| 19 | Daniel Weintraub       | MD  | yes | conceptualization, investigation, methodology, supervision, and writing–review & editing.                                                                                          |
| 20 | Aleksandar Videnovic   | MD  |     | conceptualization, investigation, methodology, supervision, and writing–review & editing.                                                                                          |
| 21 | Seung Ho Choi          | MS  |     | data curation, formal analysis, investigation, methodology, validation, writing – original draft, and writing– review & editing.                                                   |
| 22 | Ryan Kurth             | MS  |     | data curation, formal analysis, investigation, methodology, validation, writing – original draft, and writing– review & editing.                                                   |
| 23 | Chelsea Caspell-Garcia | MS  |     | data curation, formal analysis, investigation, methodology, validation, writing – original draft, and writing– review & editing.                                                   |
| 24 | Christopher S. Coffey  | PhD | yes | conceptualization, data curation, formal analysis, investigation, methodology, project administration, supervision, and writing–review & editing.                                  |
| 25 | Mark Frasier           | PhD |     | conceptualization, funding acquisition, investigation, methodology, project administration, resources, and writing–review & editing.                                               |
| 26 | Luis M. A. Oliveira    | PhD |     | conceptualization, funding acquisition, investigation, methodology, project administration, resources, and writing–review & editing.                                               |
| 27 | Samantha J. Hutten     | PhD |     | conceptualization, funding acquisition, investigation, methodology, project administration, resources, and writing–review & editing.                                               |
| 28 | Todd Sherer            | PhD |     | conceptualization, funding acquisition, investigation, methodology, project administration, resources, and writing–review & editing.                                               |
| 29 | Kenneth Marek          | MD  |     | conceptualization, data curation, formal analysis, funding acquisition, investigation, methodology, project administration, resources, supervision, and writing– review & editing. |
| 30 | Claudio Soto           | PhD | yes | conceptualization, investigation, methodology, project administration, supervision, validation, and writing– review & editing.                                                     |
